# Supplementary material for: Molecular simulations of cytochrome c adsorption on positively charged surfaces: the influence of anion type and concentration
Source: Royal Society of Chemistry journal article supplement (doi:10.1039/c6cp00170j), 2016-01-01
Supplement: c6cp00170j1.pdf [file c6cp00170j1.pdf]

Electronic Supporting Information for  
**Molecular Simulations of Cytochrome c Adsorption on Positively Charged  
Surfaces: The Influence of Anion Type and Concentration**

Chunwang Peng,<sup>a</sup> Jie Liu,<sup>a,b</sup> Yun Xie<sup>c</sup> and Jian Zhou<sup>\*a</sup>

<sup>a</sup> *School of Chemistry and Chemical Engineering, Guangdong Provincial Key Lab for Green Chemical Product Technology, South China University of Technology, Guangzhou, 510640, P. R. China. E-mail: jianzhou@scut.edu.cn*

<sup>b</sup> *Key Laboratory for Green Chemical Process of Ministry of Education, School of Chemical Engineering and Pharmacy, Wuhan Institute of Technology, Wuhan 430073, China*

<sup>c</sup> *School of Chemistry and Chemical Engineering, Guangdong Pharmaceutical University, Guangzhou 510006, P. R. China*

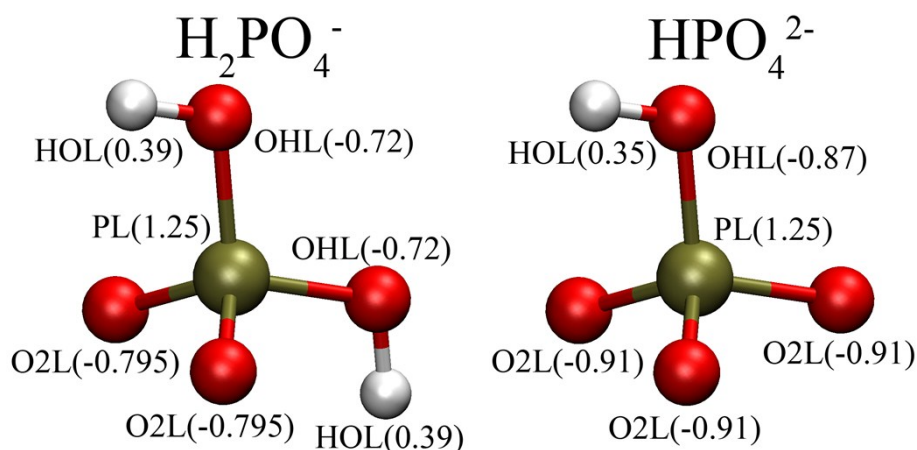

**Figure S1:** CHARMM atom-type and fractional charge assigned to each atom in phosphate ion. The charges are obtained from a structure optimized in gas phase at the B3LYP/6-31+G\* level; atoms of the same type are restrained to have identical charges. Charge assignment for dihydrogen phosphate is adopted from reference.<sup>1</sup>

### A full list of force field parameters for phosphate<sup>2-3</sup> (Tables S1-S4)

**Table S1:** Non-bonded parameters for phosphate, taken from existing parameters in the CHARMM force field.

| Atom type | $\sigma$ (nm) | $\epsilon$ (kJ·mol <sup>-1</sup> ) |
|-----------|---------------|------------------------------------|
| PL        | 0.38309       | 2.44764                            |
| O2L       | 0.30291       | 0.50208                            |
| OHL       | 0.31538       | 0.63639                            |
| HOL       | 0.04000       | 0.19246                            |

**Table S2:** Bonded parameters for  $V^{bond}$ , taken from existing parameters in the CHARMM force field.

| Atoms $i$ and $j$ | $b_0$ (nm) | $k_b$ (kJ·mol <sup>-1</sup> ·nm <sup>-2</sup> ) |
|-------------------|------------|-------------------------------------------------|
| PL O2L            | 0.148      | 485344.0                                        |
| PL OHL            | 0.159      | 198321.6                                        |
| OHL HOL           | 0.096      | 456056.0                                        |

**Table S3:** Bonded parameters for  $V^{angle}$ , taken from existing parameters in the CHARMM force field. The underlined parameters are adopted from reference.<sup>2</sup>

| Atoms $i, j$ and $k$ |           |            | $\theta_0$ (deg) | $k_\theta$ (kJ·mol <sup>-1</sup> ) | $r_{13}$ (nm) | $k_{UB}$ (kJ·mol <sup>-1</sup> ) |
|----------------------|-----------|------------|------------------|------------------------------------|---------------|----------------------------------|
| PL                   | OHL       | HOL        | 115.0            | 251.04                             | 0.23          | 33472.0                          |
| O2L                  | PL        | O2L        | 120.0            | 1004.16                            | 0.0           | 0.0                              |
| OHL                  | PL        | O2L        | 108.23           | 827.5952                           | 0.0           | 0.0                              |
| <u>OHL</u>           | <u>PL</u> | <u>OHL</u> | 104.0            | 827.5952                           | 0.0           | 0.0                              |

**Table S4:** Bonded parameters for  $V^{dihedral}$ , taken from existing parameters in the CHARMM force field.

| Atoms $i, j, k$ and $l$ |    |     |     | $\varphi_s$ (deg) | $k_\varphi$ (kJ·mol <sup>-1</sup> ) | multiplicity |
|-------------------------|----|-----|-----|-------------------|-------------------------------------|--------------|
| O2L                     | PL | OHL | HOL | 0.0               | 1.2552                              | 3            |
| OHL                     | PL | OHL | HOL | 0.0               | 1.2552                              | 3            |

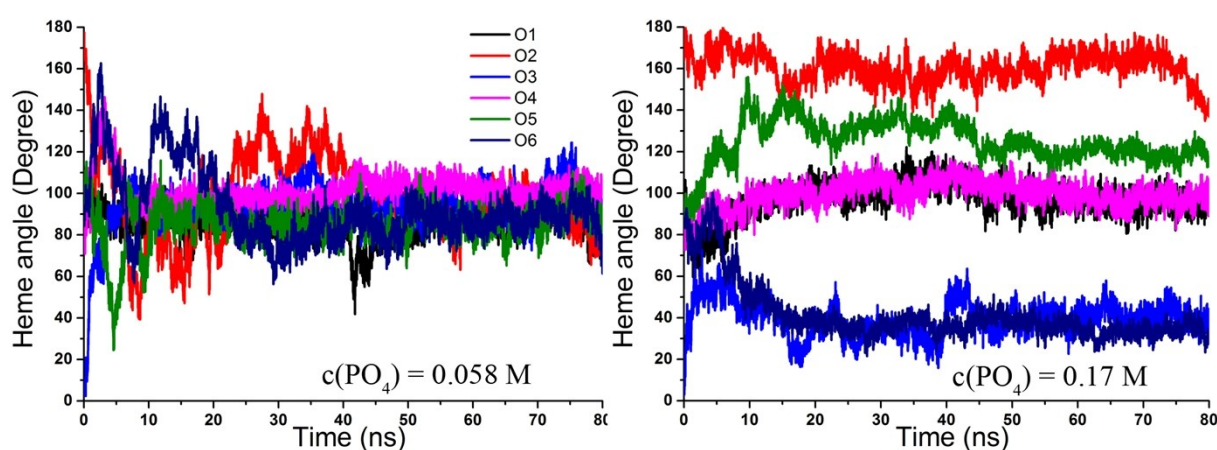

**Figure S2.** Evolution of the tilt angle of the heme prosthetic group for Cyt-c adsorbed on the NH<sub>2</sub>-SAM surface under different phosphate concentrations.

**Table S5.** Interaction Energies<sup>a</sup> between Cyt-c and the NH<sub>2</sub>-SAM Surface

| System  | Energy           | O1                              | O2            | O3            | O4                              | O5            | O6            |
|---------|------------------|---------------------------------|---------------|---------------|---------------------------------|---------------|---------------|
| 0.058 M | $E_{\text{vdw}}$ | $-75 \pm 17$                    | $-84 \pm 15$  | $-43 \pm 21$  | <b><math>-140 \pm 16</math></b> | $-28 \pm 13$  | $-46 \pm 14$  |
|         | $E_{\text{ele}}$ | <b><math>-397 \pm 58</math></b> | $-228 \pm 52$ | $-213 \pm 77$ | $-51 \pm 41$                    | $-136 \pm 41$ | $-132 \pm 80$ |
| 0.17 M  | $E_{\text{vdw}}$ | $-31 \pm 17$                    | $-25 \pm 9$   | $-96 \pm 20$  | <b><math>-162 \pm 23</math></b> | $-44 \pm 11$  | $-92 \pm 17$  |
|         | $E_{\text{ele}}$ | <b><math>-189 \pm 57</math></b> | $-32 \pm 56$  | $-132 \pm 50$ | $-44 \pm 26$                    | $-76 \pm 33$  | $-78 \pm 48$  |

<sup>a</sup>The units of the energies are kJ mol<sup>-1</sup>.

### References

- (1) Yang, W.; Gao, Y. Q.; Cui, Q.; Ma, J.; Karplus, M. The missing link between thermodynamics and structure in F1-ATPase. *Proc. Natl. Acad. Sci. U. S. A.* **2003**, *100*, 874-879.
- (2) Vanommeslaeghe, K.; Hatcher, E.; Acharya, C.; Kundu, S.; Zhong, S.; Shim, J.; Darian, E.; Guvench, O.; Lopes, P.; Vorobyov, I., et al. CHARMM general force field: A force field for drug-like molecules compatible with the CHARMM all-atom additive biological force fields. *J. Comput. Chem.* **2010**, *31*, 671-690.
- (3) Mallajosyula, S. S.; Guvench, O.; Hatcher, E.; MacKerell, A. D. CHARMM Additive All-Atom Force Field for Phosphate and Sulfate Linked to Carbohydrates. *J. Chem. Theory Comput.* **2011**, *8*, 759-776.
